# Supplementary material for: Photosynthesis-inspired bifunctional energy-harvesting devices that convert light and salinity gradients into electricity
Source: Royal Society of Chemistry journal article supplement (doi:10.1039/c8cc06076b), 2018-01-01
Supplement: c8cc06076b1.pdf [file c8cc06076b1.pdf]

## Electronic Supplementary Information

### Photosynthesis-inspired Bifunctional Energy-Harvesting Devices That Convert Light and Salinity Gradient into Electricity

Huihui Ren, Tianliang Xiao, Qianqian Zhang, and Zhaoyue Liu\*

School of Chemistry, Beihang University, Beijing 100191, P. R. China.

E-mail: [liuzy@buaa.edu.cn](mailto:liuzy@buaa.edu.cn).

#### 1. Experimental Section

##### 1.1 Materials and reagents

All chemical reagents were used without further purification. Nafion 117 membrane [a copolymer of tetrafluoroethylene and perfluoro (4-methyl-3, 6-dioxo-7-octene-1-sulfonic acid)] and Ti sheet (99.7%) were purchased from Sigma-Aldrich. Sodium sulfate and hydrofluoric acid were purchased from Beijing Chemical Works. Pt wire was purchased from Trillion Metals Co., Ltd. Deionized water was used for all of the experiments.

##### 1.2 Fabrication of the energy-harvesting device

The photosynthesis-inspired energy-harvesting device was composed of a custom-built two-chamber electrochemical cell, which was divided into two regions of anode and cathode. A quartz window was embedded on anode side of electrochemical cell for the transmission of UV light. The anode and cathode region was filled with Na<sub>2</sub>SO<sub>4</sub> aqueous with a high and low concentration respectively, which were separated by a cation-selective membrane (Nafion 117). The light-active anode was a TiO<sub>2</sub> electrode consisting of nanotubular arrays (NTAs), which was prepared by a well-established anodization route in a fluoride-contained aqueous electrolyte [1-3]. Briefly, a commercially Ti sheet with a thickness of 0.25 mm (99.7%, Aldrich) was anodized at a voltage of 20 V for 20 min in 0.5% HF aqueous solution. The voltage was supplied by a direct-current power source (Beijing Dahua Co., Ltd). After naturally dried in the air, the anodized Ti sheet was annealed at 450 °C for 3 h to achieve the anatase crystallization. The cathode was a chemically inert Pt electrode, which was used to relay the light-induced electrons in the circuit.

##### 1.3 Characterization

The crystallization of TiO<sub>2</sub> NTAs was characterized with a Shimadzu XRD-6000 X-ray diffraction meter (XRD) at a diffraction angle between 20 ° and 80 °. The surface and cross-sectional morphologies were studied using a FEI Quanta FEG 250 environmental scanning electron microscope (SEM).

#### 1. 4 Electric measurement

The energy conversion performance of the device from light energy and salinity gradient was characterized by measuring the current-voltage ( $I$ - $V$ ) and current-time ( $I$ - $t$ ) curves using a CHI660E electrochemical potentiostat (Shanghai Chenhua Instrument Company) at two-electrode configuration. The short-circuit current density ( $I_{sc}$ ) and open-circuit voltage ( $V_{oc}$ ) were read from the intercept of  $I$ - $V$  curve on the current and voltage axes respectively. The incident light was 365-nm parallel light with an irradiance of 5.7 mW/cm<sup>2</sup> from a super-high pressure mercury lamp (CHF-XM500, Beijing Trusttech Co. Ltd, China). The salinity gradient was provided by two Na<sub>2</sub>SO<sub>4</sub> aqueous electrolytes with different concentrations. The power output of the devices was obtained from the  $I$ - $V$  curves. The power output ( $P$ ) at a certain voltage was calculated by multiplying voltage ( $V$ ) and the corresponding current ( $I$ ), *i. e.*  $P=I \times V$ . The maximal power output ( $P_{max}$ ) was obtained by reading the peak value from the plot of power output vs. voltage (from 0 to  $V_{oc}$ ).

The diffusion potential across the cation-selective membrane ( $E_{diff}$ ) formed by the diffusion of Na<sub>2</sub>SO<sub>4</sub> electrolytes from high to low concentration was obtained from the  $I$ - $V$  curves measured by a Keithley 6487 picoameter (Keithley Instruments, Cleveland, OH) using two Ag/AgCl electrodes. The side of high-concentration Na<sub>2</sub>SO<sub>4</sub> electrolyte was defined to be an anode region. The  $E_{diff}$  was read from the intercept of  $I$ - $V$  curve on the voltage axis.

## 2. Supplementary Figure

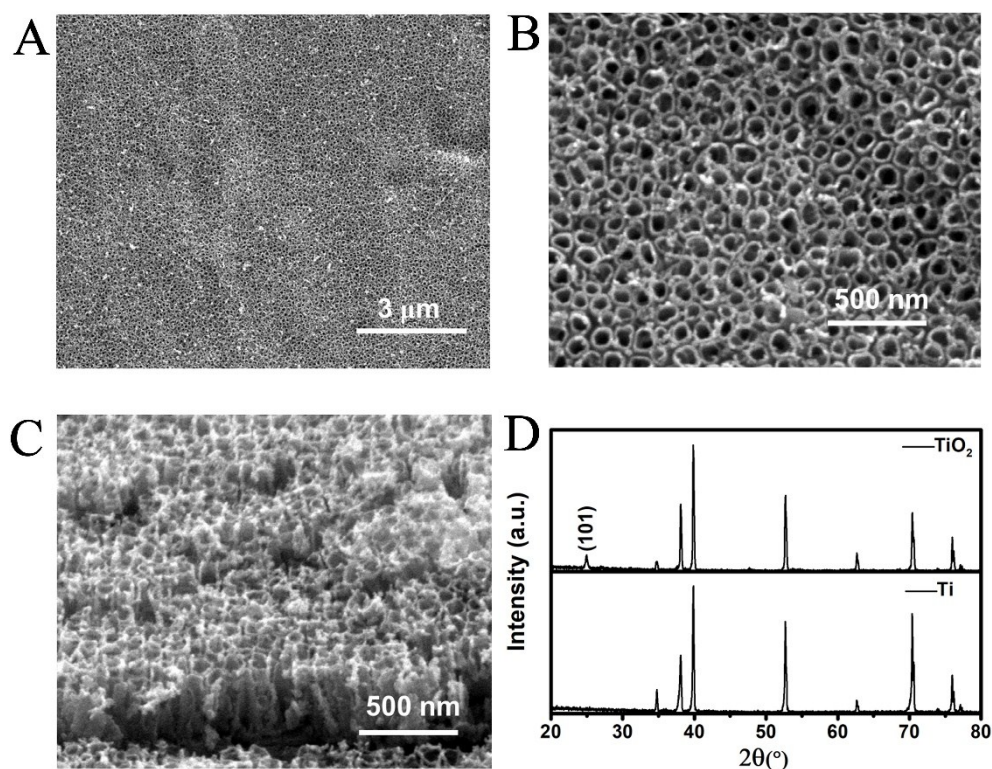

**Fig. S1** (A, B) The top-viewed SEM image of  $\text{TiO}_2$  nanotubular arrays (NTAs) at a low (A) and high (B) magnification. (C) The Cross-sectional SEM image. (D) XRD patterns of  $\text{TiO}_2$  NTAs and Ti substrate. The large-scale, uniform and well-defined  $\text{TiO}_2$  NTAs show an average internal diameter of  $\sim 72.5$  nm and a wall thicknesses of  $\sim 14.9$  nm. The length of  $\text{TiO}_2$  NTAs is  $\sim 250.6$  nm.  $\text{TiO}_2$  NTAs demonstrated an anatase crystallization.

### 3. References:

- [1] Q. Cai, M. Paulose, O. K. Varghese and C. A. Grimes, *J. Mater. Res.*, 2005, 20, 230-236.
- [2] K. Lee, A. Mazare, P. Schmuki, *Chem. Rev.*, 2014, 114, 9385–9454.
- [3] Z. Liu, V. Subramania, M. Misra, *J. Phys. Chem. C* 2009, 113, 14028–14033.
